# Supplementary material for: Human formin FHOD3-mediated actin elongation is required for sarcomere integrity in cardiomyocytes
Source: eLife journal article supplement (doi:10.7554/elife.104048), 2024-12-20

Flipped left to right

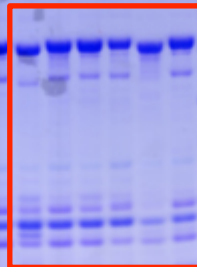

Supplement: fig1-figsupp1-data1 [file elife-104048-fig1-figsupp1-data1-v1.pdf]
