# Supplementary material for: Human formin FHOD3-mediated actin elongation is required for sarcomere integrity in cardiomyocytes
Source: eLife journal article supplement (doi:10.7554/elife.104048), 2024-12-20

Figure 2

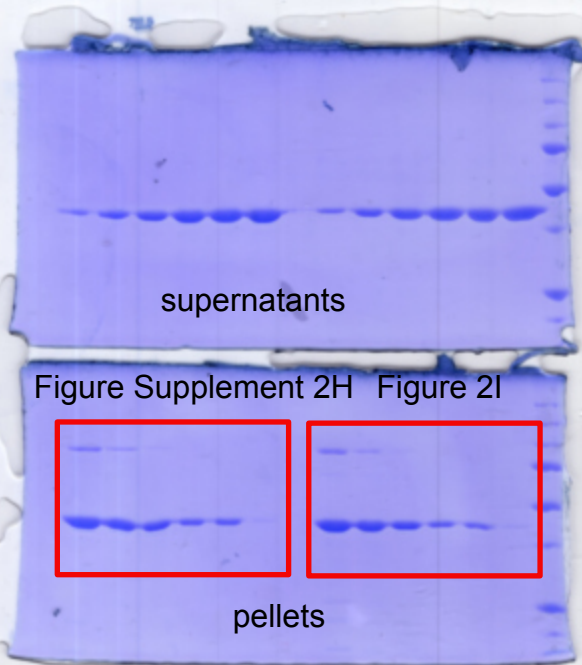

Supplement: fig2-data1 [file elife-104048-fig2-data1-v1.pdf]
