# Supplementary figures and images for: Human formin FHOD3-mediated actin elongation is required for sarcomere integrity in cardiomyocytes
Source: eLife journal article supplement (doi:10.7554/elife.104048), 2024-12-20

Figure 4B

HA

FHOD3

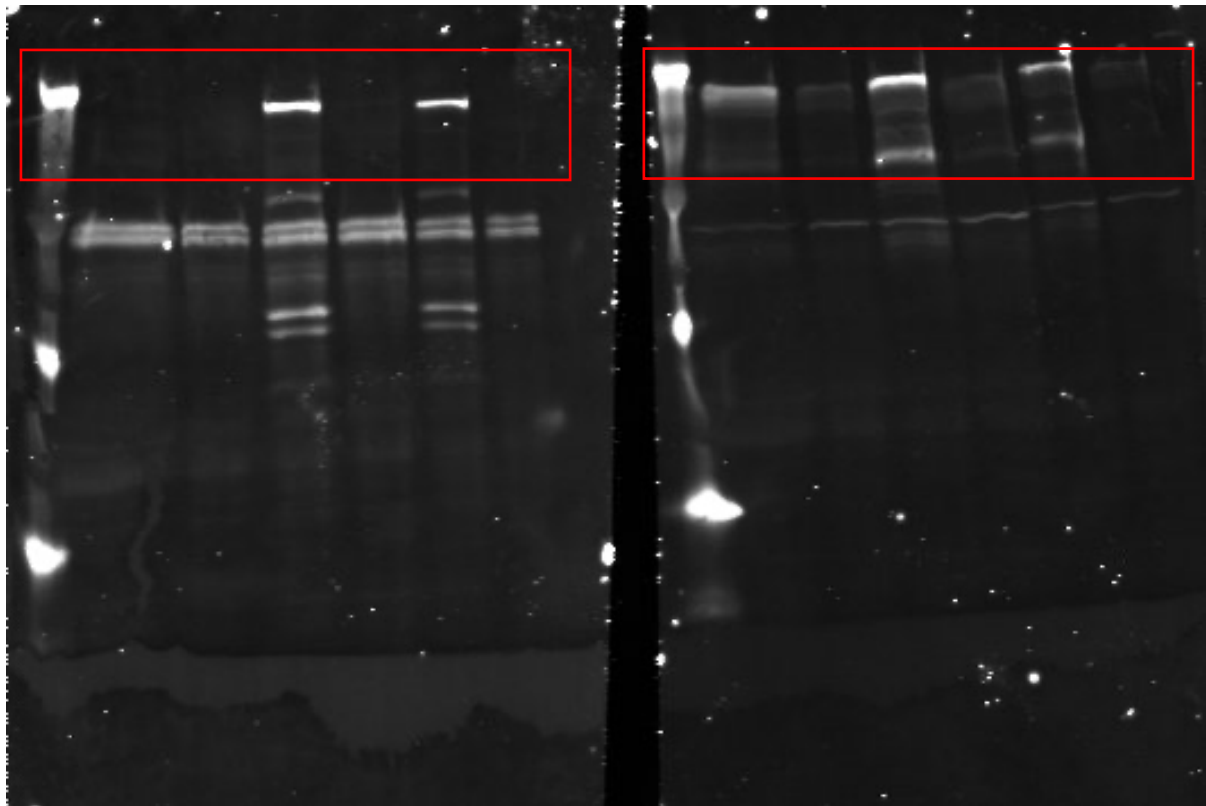

Supplement: fig4-data1 [file elife-104048-fig4-data1-v1.zip]

Figure 4B: GAPDH

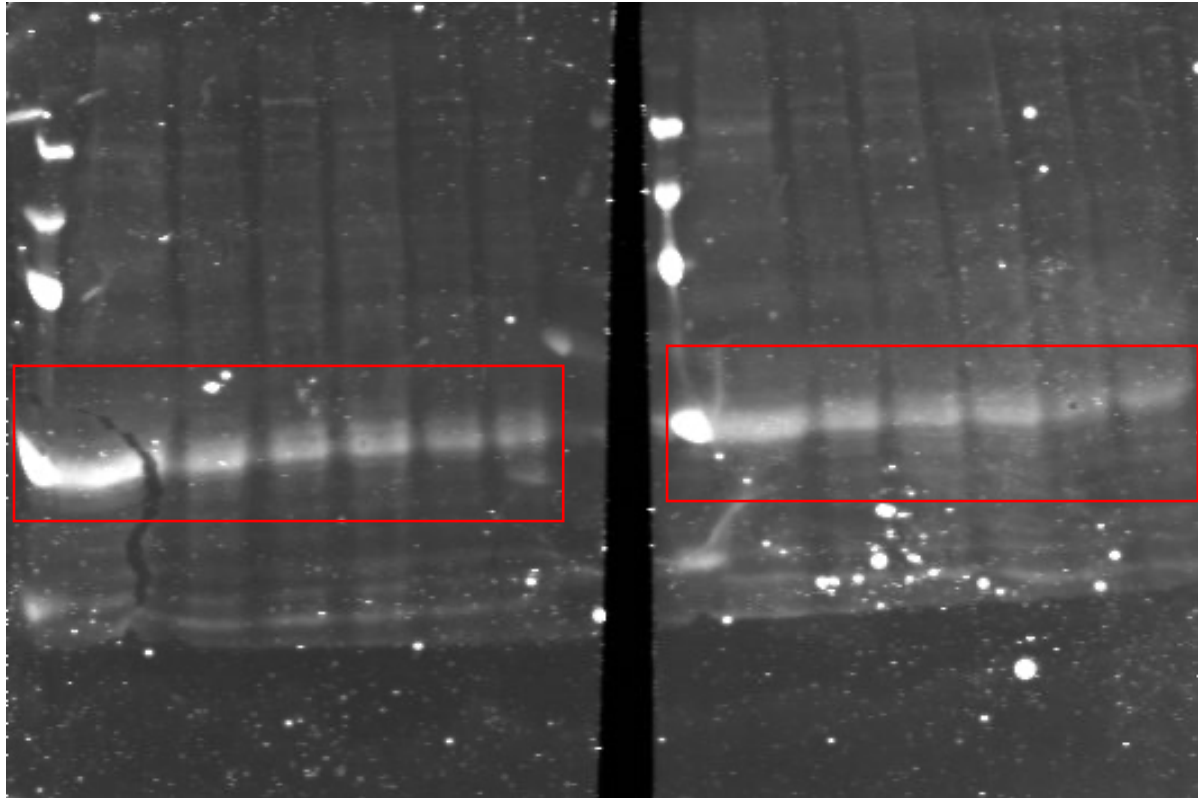

Supplement: fig4-data1 [file elife-104048-fig4-data1-v1.zip]
